# Supplementary material for: Whole Exome Sequencing Identifies New Host Genomic Susceptibility Factors in Empyema Caused by Streptococcus pneumoniae in Children: A Pilot Study
Source: Genes (Basel). 2018 May 3;9(5):240. doi: 10.3390/genes9050240 (PMC5977180; doi:10.3390/genes9050240)
Supplement: Supplementary file 1 [file genes-09-00240-s001.zip › Table S1.xls]

## Sheet: Table S1
Table S1. ID and details of samples used for transcription analyses.
ID	Phenotype	Study	Tissue	Species
GSM1405992	Cornea_normal_rep1	GSE58291	Cornea	Homo Sapiens
GSM1405993	Cornea_normal_rep2	GSE58291	Cornea	Homo Sapiens
GSM1405994	Cornea_bacterial_keratitis_rep1	GSE58291	Cornea	Homo Sapiens
GSM1405995	Cornea_normal_rep3	GSE58291	Cornea	Homo Sapiens
GSM1405997	Cornea_normal_rep4	GSE58291	Cornea	Homo Sapiens
GSM1405998	Cornea_normal_rep5	GSE58291	Cornea	Homo Sapiens
GSM1406000	Cornea_bacterial_keratitis_rep2	GSE58291	Cornea	Homo Sapiens
GSM1406004	Cornea_normal_rep6	GSE58291	Cornea	Homo Sapiens
GSM1406005	Cornea_normal_rep7	GSE58291	Cornea	Homo Sapiens
GSM1406008	Cornea_bacterial_keratitis_rep3	GSE58291	Cornea	Homo Sapiens
GSM1406009	Cornea_bacterial_keratitis_rep4	GSE58291	Cornea	Homo Sapiens
GSM1406010	Cornea_normal_rep8	GSE58291	Cornea	Homo Sapiens
GSM1406011	Cornea_bacterial_keratitis_rep5	GSE58291	Cornea	Homo Sapiens
GSM1406012	Cornea_normal_rep9	GSE58291	Cornea	Homo Sapiens
GSM1406013	Bacterial keratitis rep6	GSE58291	Cornea	Homo Sapiens
GSM1406014	Cornea_normal_rep10	GSE58291	Cornea	Homo Sapiens
GSM1406015	Cornea_normal_rep11	GSE58291	Cornea	Homo Sapiens
GSM1406019	Cornea_normal_rep12	GSE58291	Cornea	Homo Sapiens
GSM1406020	Cornea_normal_rep13	GSE58291	Cornea	Homo Sapiens
GSM1040581	lung_AscKO_6303_High_6hrs_1	GSE42464	Lung	Mus musculus
GSM1040582	lung_AscKO_6303_High_6hrs_2	GSE42464	Lung	Mus musculus
GSM1040583	lung_AscKO_6303_High_6hrs_3	GSE42464	Lung	Mus musculus
GSM1040587	lung_AscKO_D39_High_6hrs_1	GSE42464	Lung	Mus musculus
GSM1040588	lung_AscKO_D39_High_6hrs_2	GSE42464	Lung	Mus musculus
GSM1040589	lung_AscKO_D39_High_6hrs_3	GSE42464	Lung	Mus musculus
GSM1040596	lung_WT_6303_High_6hrs_1-1	GSE42464	Lung	Mus musculus
GSM1040597	lung_WT_6303_High_6hrs_1-2	GSE42464	Lung	Mus musculus
GSM1040598	lung_WT_6303_High_6hrs_1-3	GSE42464	Lung	Mus musculus
GSM1040603	lung_WT_1rep	GSE42464	Lung	Mus musculus
GSM1040604	lung_WT_D39_High_48hrs_1rep	GSE42464	Lung	Mus musculus
GSM1040605	lung_AscKO_D39_High_6hrs_4	GSE42464	Lung	Mus musculus
GSM1040606	lung_Nlrp3KO_6303_High_6hrs_1	GSE42464	Lung	Mus musculus
GSM1040607	lung_Nlrp3KO_6303_High_6hrs_2	GSE42464	Lung	Mus musculus
GSM1040611	lung_Nlrp3KO_D39_High_6hrs_1	GSE42464	Lung	Mus musculus
GSM1040612	lung_Nlrp3KO_D39_High_6hrs_2	GSE42464	Lung	Mus musculus
GSM1040613	lung_Nlrp3KO_D39_High_6hrs_3	GSE42464	Lung	Mus musculus
GSM1040621	lung_WT_6303_High_6hrs_2-1	GSE42464	Lung	Mus musculus
GSM1040622	lung_WT_6303_High_6hrs_2-2	GSE42464	Lung	Mus musculus
GSM1040626	lung_WT_D39_High_48hrs_1	GSE42464	Lung	Mus musculus
GSM1040627	lung_WT_D39_High_48hrs_2	GSE42464	Lung	Mus musculus
GSM1040628	lung_WT_D39_High_48hrs_3	GSE42464	Lung	Mus musculus
GSM1040629	lung_WT_D39_High_48hrs_4	GSE42464	Lung	Mus musculus
GSM1040630	lung_WT_D39_High_48hrs_5	GSE42464	Lung	Mus musculus
GSM1040631	lung_WT_D39_High_48hrs_male_1	GSE42464	Lung	Mus musculus
GSM1040632	lung_WT_D39_High_48hrs_male_2	GSE42464	Lung	Mus musculus
GSM1040633	lung_WT_D39_High_48hrs_male_3	GSE42464	Lung	Mus musculus
GSM1040634	lung_WT_D39_High_6hrs_1	GSE42464	Lung	Mus musculus
GSM1040635	lung_WT_D39_High_6hrs_2	GSE42464	Lung	Mus musculus
GSM1040636	lung_WT_D39_High_6hrs_3	GSE42464	Lung	Mus musculus
GSM1040637	lung_WT_D39_High_6hrs_4	GSE42464	Lung	Mus musculus
GSM1040593	lung_AscKO_1	GSE42464	Lung	Mus musculus
GSM1040594	lung_AscKO_2	GSE42464	Lung	Mus musculus
GSM1040595	lung_AscKO_3	GSE42464	Lung	Mus musculus
GSM1040618	lung_Nlrp3KO_1	GSE42464	Lung	Mus musculus
GSM1040619	lung_Nlrp3KO_2	GSE42464	Lung	Mus musculus
GSM1040620	lung_Nlrp3KO_3	GSE42464	Lung	Mus musculus
GSM1040642	lung_WT_1	GSE42464	Lung	Mus musculus
GSM1040643	lung_WT_2	GSE42464	Lung	Mus musculus
GSM1040644	lung_WT_3	GSE42464	Lung	Mus musculus
GSM1201400	BALB/c 6h post pneumococcal infection, replicate 1	GSE49533	Lung	Mus musculus
GSM1201401	BALB/c 6h post pneumococcal infection, replicate 2	GSE49533	Lung	Mus musculus
GSM1201402	BALB/c 6h post pneumococcal infection, replicate 3	GSE49533	Lung	Mus musculus
GSM1201403	BALB/c 6h post pneumococcal infection, replicate 4	GSE49533	Lung	Mus musculus
GSM1201404	BALB/c 6h post pneumococcal infection, replicate 5	GSE49533	Lung	Mus musculus
GSM1201405	BALB/c PBS-treated, 6h Tp, replicate 1	GSE49533	Lung	Mus musculus
GSM1201406	BALB/c PBS-treated, 6h Tp, replicate 2	GSE49533	Lung	Mus musculus
GSM1201407	BALB/c PBS-treated, 6h Tp, replicate 3	GSE49533	Lung	Mus musculus
GSM1201408	BALB/c PBS-treated, 6h Tp, replicate 4	GSE49533	Lung	Mus musculus
GSM1201409	BALB/c PBS-treated, 6h Tp, replicate 5	GSE49533	Lung	Mus musculus
GSM1201410	BALB/c PBS-treated, 6h Tp, replicate 6	GSE49533	Lung	Mus musculus
GSM1201411	CBA/Ca 6h post pneumococcal infection, replicate 1	GSE49533	Lung	Mus musculus
GSM1201412	CBA/Ca 6h post pneumococcal infection, replicate 2	GSE49533	Lung	Mus musculus
GSM1201413	CBA/Ca 6h post pneumococcal infection, replicate 3	GSE49533	Lung	Mus musculus
GSM1201414	CBA/Ca 6h post pneumococcal infection, replicate 4	GSE49533	Lung	Mus musculus
GSM1201415	CBA/Ca 6h post pneumococcal infection, replicate 5	GSE49533	Lung	Mus musculus
GSM1201416	CBA/Ca PBS-treated, 6h Tp, replicate 1	GSE49533	Lung	Mus musculus
GSM1201417	CBA/Ca PBS-treated, 6h Tp, replicate 2	GSE49533	Lung	Mus musculus
GSM1201418	CBA/Ca PBS-treated, 6h Tp, replicate 3	GSE49533	Lung	Mus musculus
GSM1201419	CBA/Ca PBS-treated, 6h Tp, replicate 4	GSE49533	Lung	Mus musculus
GSM1201420	CBA/Ca PBS-treated, 6h Tp, replicate 5	GSE49533	Lung	Mus musculus
GSM1201421	CBA/Ca PBS-treated, 6h Tp, replicate 6	GSE49533	Lung	Mus musculus
GSM1111225	Non-infected lung - repeat 1 - mAdbID:117550	GSE45644	Lung	Mus musculus
GSM1111226	Vehicle-immunized lung - 48 hr - repeat 1 - mAdbID:117551	GSE45644	Lung	Mus musculus
GSM1111229	Non-infected lung - repeat 2 - mAdbID:117555	GSE45644	Lung	Mus musculus
GSM1111230	Vehicle-immunized lung - 48 hr - repeat 2 - mAdbID:117556	GSE45644	Lung	Mus musculus
GSM1111233	Non-infected lung - repeat 3 - mAdbID:117560	GSE45644	Lung	Mus musculus
GSM1111234	Vehicle-immunized lung - 48 hr - repeat 3 - mAdbID:117561	GSE45644	Lung	Mus musculus
GSM1111237	Non-infected lung - repeat 4 - mAdbID:117565	GSE45644	Lung	Mus musculus
GSM1111238	Vehicle-immunized lung - 48 hr - repeat 4 - mAdbID:117566	GSE45644	Lung	Mus musculus
GSM1111241	Non-infected lung - repeat 5 - mAdbID:117570	GSE45644	Lung	Mus musculus
GSM1111242	Vehicle-immunized lung - 48 hr - repeat 5 - mAdbID:117571	GSE45644	Lung	Mus musculus
GSM1206498	healthy control	GSE49755	Plasma	Homo Sapiens
GSM1206501	healthy control	GSE49755	Plasma	Homo Sapiens
GSM1206504	healthy control	GSE49755	Plasma	Homo Sapiens
GSM1206511	healthy control	GSE49755	Plasma	Homo Sapiens
GSM1206515	healthy control	GSE49755	Plasma	Homo Sapiens
GSM1206516	healthy control	GSE49755	Plasma	Homo Sapiens
GSM1206519	healthy control	GSE49755	Plasma	Homo Sapiens
GSM1206527	healthy control	GSE49755	Plasma	Homo Sapiens
GSM1206528	healthy control	GSE49755	Plasma	Homo Sapiens
GSM1206529	healthy control	GSE49755	Plasma	Homo Sapiens
GSM1206532	healthy control	GSE49755	Plasma	Homo Sapiens
GSM1206536	healthy control	GSE49755	Plasma	Homo Sapiens
GSM1206507	S.pneumoniae sepsis	GSE49755	Plasma	Homo Sapiens
GSM1206522	S.pneumoniae sepsis	GSE49755	Plasma	Homo Sapiens
GSM1206530	S.pneumoniae sepsis	GSE49755	Plasma	Homo Sapiens
GSM1206537	S.pneumoniae sepsis	GSE49755	Plasma	Homo Sapiens
